# Supplementary material
Source: PubMed Central journal article supplement (PMC9938950)
Supplement: NIHMS1855112-supplement-1.pdf [file NIHMS1855112-supplement-1.pdf]

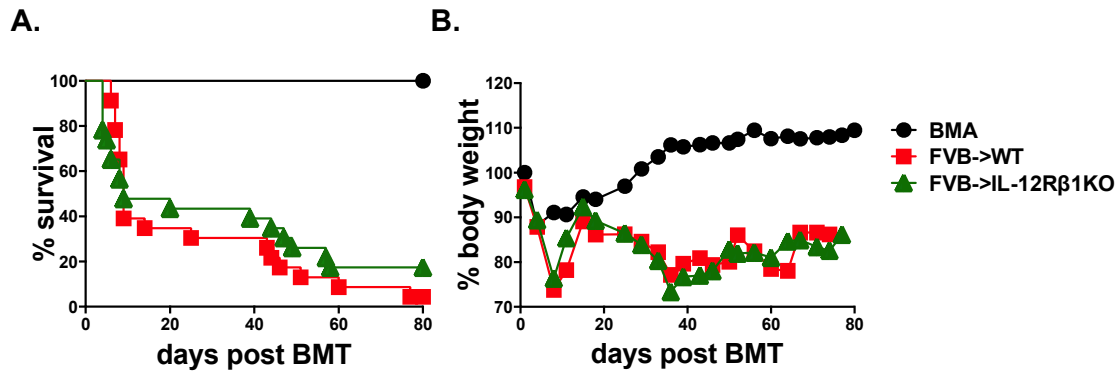

**Fig S1. IL-12R $\beta$ 1 in recipients does not impact aGVHD development.** Lethally irradiated WT and IL-12R $\beta$ 1KO B6 mice (1100cGy) were transplanted with  $5 \times 10^6$  TCD-BM alone (BMA, n=4) or plus  $1 \times 10^6$  purified T cells isolated from FVB mice (9 mice per group). Recipients were monitored for (A) survival and (B) body weight loss until 80 days post BMT. Data shown are from 5 repeated experiments.

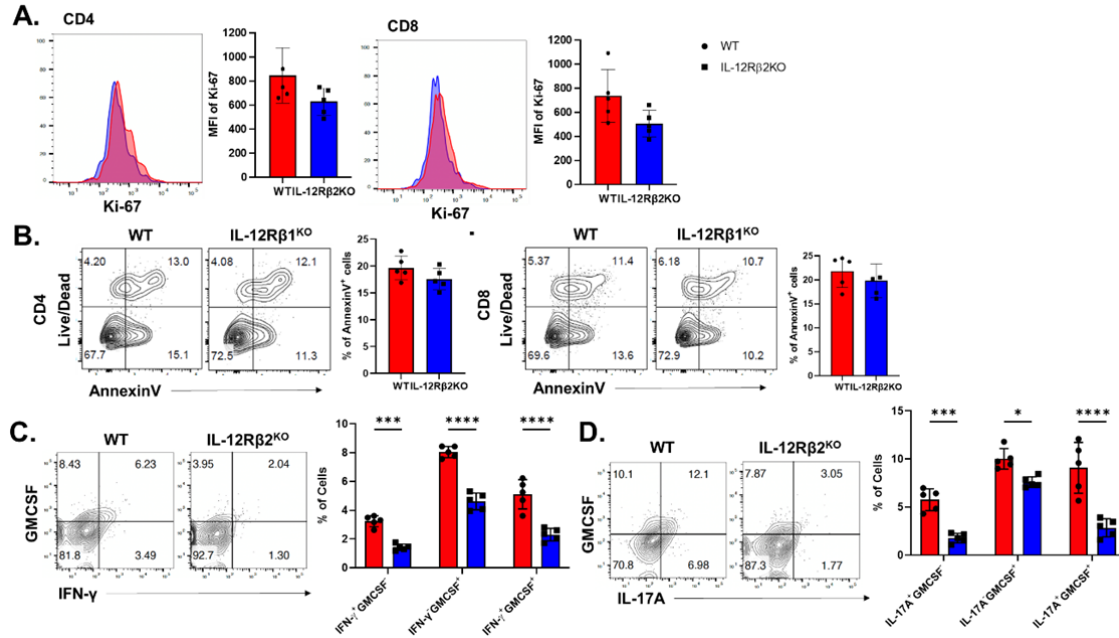

**Fig S2. IL-12R $\beta$ 2 in recipients does not impact T cell proliferation and apoptosis while it increases the cytokine production of donor T cells.** Lethally irradiated WT and IL-12R $\beta$ 2KO B6 mice (1200cGy) were transplanted with  $5 \times 10^6$  TCD-BM plus  $0.75 \times 10^6$  purified T cells isolated from FVB mice. Recipient intestines were harvested on day 14 after BMT and analyzed with flow cytometry. Representative histogram and MFI of Ki-67 in CD4<sup>+</sup> or CD8<sup>+</sup> T cells are shown (A). Representative flow dot and the percentage of Annexin V are shown (B). Average frequencies of IFN- $\gamma$ <sup>+</sup>, IL17A<sup>+</sup>, and GM-CSF<sup>+</sup> among gated donor CD4<sup>+</sup> T cells are shown (C and D). The experiments were repeated 3 independent times. 5 mice per group were used in each experiment. \* p < 0.05, \*\*\*p < 0.001 and \*\*\*\*p < 0.0001.

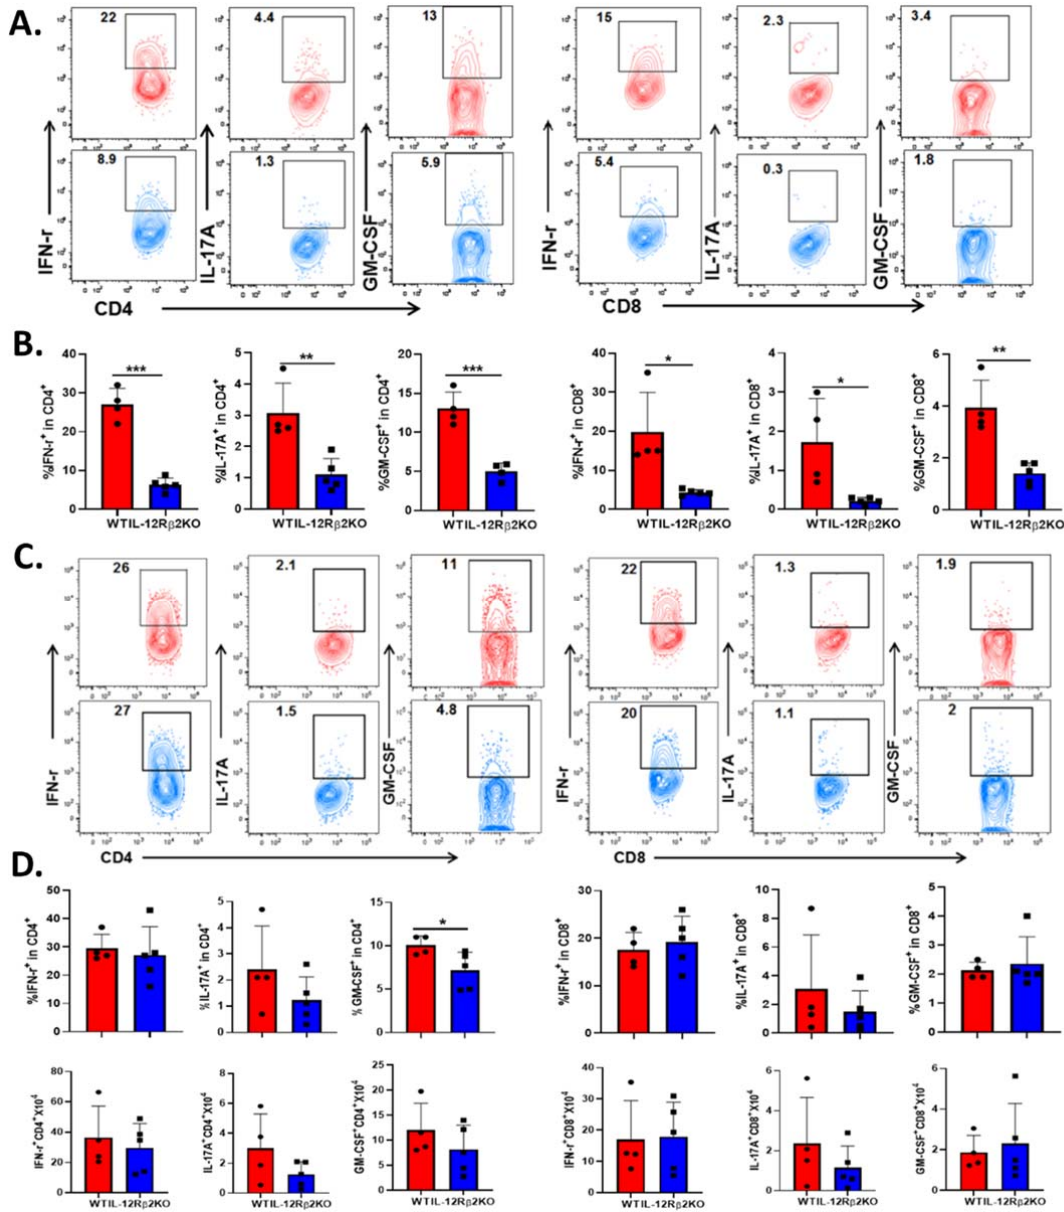

**Fig. S3. IL-12R $\beta$ 2 promotes cytokine production in donor T cells in recipient mLN and spleen.** Lethally irradiated WT and IL-12R $\beta$ 2KO B6 mice underwent BMT with  $5 \times 10^6$  TCD-BM from FVB mice (Thy1.1<sup>+</sup>) alone (BMA) or plus splenocytes (equal to  $0.5 \times 10^6$  T cells) from FVB mice (Thy1.2<sup>+</sup>). Recipient mLNs and spleen were collected on day 14 after BMT and analyzed with flow cytometry. Representative flow dot plots and average frequencies and absolute counts of IFN- $\gamma$ <sup>+</sup>, IL17A<sup>+</sup>, and GM-CSF<sup>+</sup> among gated donor CD4<sup>+</sup> or CD8<sup>+</sup> T cells from mLN (A and B) or spleen (C and D) are shown. The experiments were repeated 3 independent times. 4-5 mice per group were used for each experiment. \*  $p < 0.05$ , \*\*  $p < 0.01$  and \*\*\*  $p < 0.001$ .

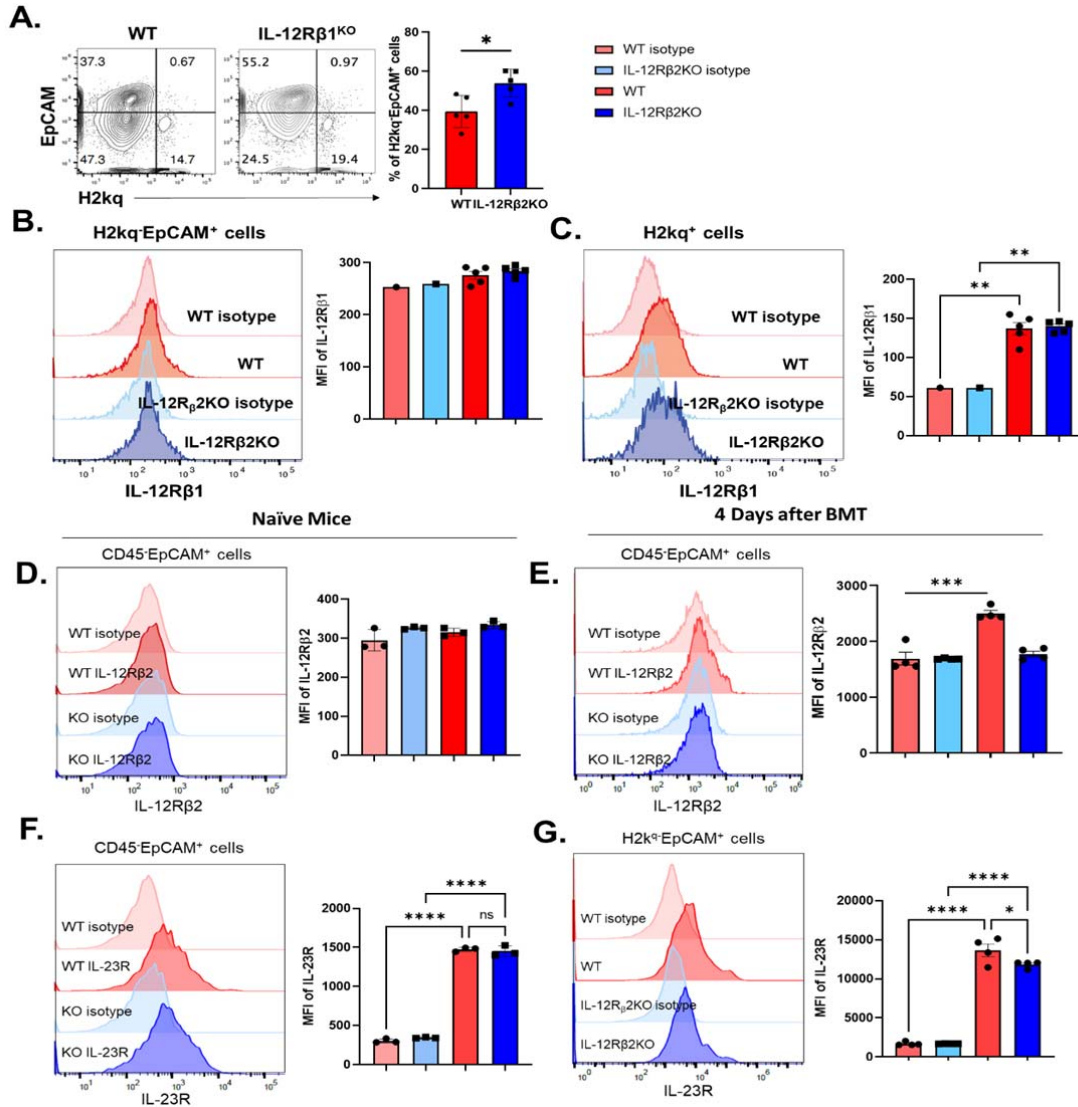

**Fig S4. Expression of IL-12Rβ2 on host and donor cells in recipient intestines.** Lethally irradiated WT and IL-12Rβ2KO B6 mice (1200cGy) were transplanted with  $5 \times 10^6$  TCD-BM plus  $0.75 \times 10^6$  purified T cells isolated from FVB mice. Recipient intestines were harvested on day 14 after BMT and analyzed with flow cytometry. Representative flow figure and percentage of H2K<sup>q</sup>EpCAM<sup>+</sup> IECs are shown (A). Representative histogram and MFI of IL-12Rβ2 in IEC (B) and infiltrated donor cells (C) are shown. IECs were isolated from unmanipulated WT and IL-12Rβ2KO B6 mice and tested the expression of IL-12Rβ2 (D) and IL-23R (F). WT and IL-12Rβ2KO B6 mice were irradiated (1200cGy) and transplanted with  $5 \times 10^6$  splenocyte from FVB mice. Four days after BMT, IECs were isolated for flow cytometry analysis. Expression of IL-12Rβ2 (E) and IL-23R (G) in IECs were shown. The experiments were repeated 3 independent times. 3-5 mice per group were used in each experiment.

\*  $p < 0.05$ , \*\* $p < 0.01$  and \*\*\* $p < 0.001$ .
